# Supplementary material for: The methane-driven interaction network in terrestrial methane hotspots
Source: PubMed Central journal article supplement (PMC8981696; doi:10.1186/s40793-022-00409-1), 2022-04-05
Supplement: 40793_2022_409_MOESM1_ESM.pdf [file 40793_2022_409_MOESM1_ESM.pdf]

1 **Supplementary Information**

2

3 **The methane-driven interaction network in terrestrial methane hotspots.**

4

5 Thomas Kaupper<sup>1</sup>, Lucas W. Mendes<sup>2</sup>, Anja Poehlein<sup>3</sup>, Daria Frohloff<sup>1</sup>, Stephan Rohrbach<sup>1</sup>,  
6 Marcus A. Horn<sup>1\*</sup>, Adrian Ho<sup>1\*</sup>.

7

8 <sup>1</sup>Institute for Microbiology, Leibniz Universität Hannover, Herrenhäuser Str. 2, 30419  
9 Hannover, Germany.

10 <sup>2</sup>Center for Nuclear Energy in Agriculture, University of São Paulo CENA-USP, Brazil.

11 <sup>3</sup>Department of Genomic and Applied Microbiology and Göttingen Genomics Laboratory,  
12 Institute of Microbiology and Genetics, George-August University Göttingen, Grisebachstr. 8,  
13 D-37077 Göttingen, Germany.

14

15 \*For correspondence: Adrian Ho (adrian.ho@ifmb.uni-hannover.de), Marcus A. Horn  
16 (horn@ifmb.uni-hannover.de).

17

18 Running title: The methanotroph interactome.

19

20 **Included:**

- 21 • **Supplementary tables.**
- 22 • **Supplementary figures and figure captions**

23

24

25 **Table S1:** Selected physico-chemical parameters and methane uptake rates of individual  
26 replicates in methane hotspots (rice paddy soil, landfill cover soil, pristine peatland, restored  
27 peatland, and riparian soil). Summarized data given in Table 1.

28

29 **Table S2:** Significantly positively and negatively co-occurring ( $p < 0.01$ ) OTUs between  
30 environments, as determined by the co-occurrence network analysis. The first panel shows  
31 site-specific co-occurring OTUs, while the other panels show shared co-occurring OTUs  
32 between environments. The OTUs were given to the finest resolveable taxonomic affiliation  
33 based on the Silva database v. 132, whenever available. The number in brackets refer to the  
34 OTU numbers. Abbreviations: pos, positive correlations; neg, negative correlations; RP, rice  
35 paddy; LC, landfill cover soil; PP, pristine peatland; RP, restored peatland; RS, riparian soil;  
36 MIP, methanotroph interacting partner (including other co-occurring methanotrophs).

37

38 **Table S3:** Significantly positively and negatively co-occurring ( $p < 0.01$ ) OTUs in the pristine  
39 peatland over time (days 8, 13, and 19, respectively denoted by T1, T2, and T3), as determined  
40 by the co-occurrence network analysis. The first panel shows co-occurring OTUs at each time  
41 interval while the other panels show shared co-occurring OTUs between time intervals. The  
42 OTUs were given to the finest resolveable taxonomic affiliation based on the Silva database v.  
43 132, whenever available. The number in brackets refer to the OTU numbers. Abbreviations:  
44 pos, positive correlations; neg, negative correlations; T1, after 8 days incubation; T2, after 13  
45 days incubation; T3, after 19 days incubation; MIP, methanotroph interacting partner  
46 (including other co-occurring methanotrophs).

47

48 **Table S4:** Sample names/treatment and corresponding accession numbers (BioProject  
49 PRJNA751592). Sample name is labelled in the following order: site, sampling time, 12C or 13C  
50 (i.e., <sup>unlabelled</sup>C or <sup>13</sup>C-CH<sub>4</sub> incubations), H or L (i.e., “heavy” or “light” fractions). Note that for  
51 the pristine peatland, T1 and T3 correspond to days 8 and 19, respectively; samples from day  
52 13 are published (Table 1; [1]).

53

54

55

56

57

58

59

60

61

62

63

64

65

66

67

68

69

70

71

72 **Figure Legends**

73

74 **Figure S1:** The *pmoA* and 16S rRNA gene abundances in the starting material and after  
75 incubation in diverse environments (mean  $\pm$  s.d.;  $n \geq 4$ ). The qPCR assay was performed in  
76 duplicate for each DNA extraction. The 16S rRNA and *pmoA* gene abundances for all samples  
77 were at least an order of magnitude higher than the lower detection limit of the qPCR assays.  
78 The upper and lower case letters indicate the level of significance ( $p < 0.05$ ) of the 16S rRNA  
79 gene and *pmoA* gene abundance between environments in the starting material. The asterisk  
80 indicates significant difference ( $p < 0.05$ ) in the starting *pmoA* gene abundance and after  
81 incubation. The numbers at the top of each bar refer to the *pmoA*:16S rRNA gene abundance  
82 ratio in percentage (%), which increased after incubation.

83

84 **Figure S2:** Relative *pmoA* gene abundance along the density gradient of the  $^{13}\text{C}$ - and  $^{\text{unlabelled}}\text{C}$ -  
85  $\text{CH}_4$  incubations with the (a) paddy soil, (b) landfill cover soil, (c) restored peatland, (d) pristine  
86 peatland, and (e) riparian soil (mean  $\pm$  s.d.;  $n = 4$  each). The results of the paddy soil (a; [2]) and  
87 the peatlands (c,d; [1]) were re-analysed for the present study. The *pmoA* gene relative  
88 abundance was calculated as the proportion of each fraction over the total sum of all fractions  
89 per sample. The density gradients of the  $^{13}\text{C}$ - and  $^{\text{unlabelled}}\text{C}$ - $\text{CH}_4$  incubations were compared to  
90 distinguish the “light” from the “heavy” fraction in the  $^{13}\text{C}$ - $\text{CH}_4$  incubation. The arrows denote  
91 the “light” and “heavy” fractions where the 16S rRNA gene was amplified for Illumina MiSeq  
92 sequencing in the  $^{13}\text{C}$ - $\text{CH}_4$  incubations.

93

94 **Figure S3:** Relative *pmoA* gene abundance along the density gradient of the  $^{13}\text{C}$ - and  $^{\text{unlabelled}}\text{C}$ -  
95  $\text{CH}_4$  incubations in the pristine peat at days 8, 13, and 19 (mean  $\pm$  s.d.;  $n = 4$  each). The *pmoA*

96 gene relative abundance was calculated as the proportion of each fraction over the total sum  
97 of all fractions per sample. The arrows denote the “light” and “heavy” fractions where the 16S  
98 rRNA gene was amplified for Illumina MiSeq sequencing in the  $^{13}\text{C}$ -CH<sub>4</sub> incubations.

99

100 **Figure S4:** Mean relative abundance of the methanotroph-affiliated OTUs in the paddy soil,  
101 landfill cover soil, pristine/restored peatlands, and riparian soil based on the 16S rRNA gene  
102 sequences in the starting material and after the incubation with  $^{13}\text{C}$ -methane (“light” and  
103 “heavy” fractions). The numbers at the bottom of the bars denote the mean proportion (%)  
104 of the methanotroph-affiliated OTUs among the total 16S rRNA gene sequences.  
105 Abbreviations; S.M, starting material; L, “light” fraction; H, “heavy” fraction.

106

107 **Figure S5:** Mean relative abundance of the methanotroph-affiliated OTUs in the pristine  
108 peatland after 8, 13, and 19 days incubation with  $^{13}\text{C}$ -methane (“light” and “heavy” fractions),  
109 based on the 16S rRNA gene sequences. The numbers at the bottom of the bars denote the  
110 mean proportion (%) of the methanotroph-affiliated OTUs among the total 16S rRNA gene  
111 sequences.

112

113 **Figure S6:** Principal component analysis showing the clustering of the 16S rRNA gene  
114 sequences in the “light” and “heavy” fractions of the (a) paddy soil (orange, triangle), (b)  
115 landfill cover soil (purple, circle), (c) pristine peatland (light green, square), (d) restored  
116 peatland (dark green, square), and (e) riparian soil (blue, inverted triangle). All replicates (n=4)  
117 are given; in the incubation with the riparian soil, fractionation was unsuccessful for one  
118 replicate. Full colored and striped symbols represent the “light” and “heavy” fraction,  
119 respectively.

120

121 **Figure S7:** Principal component analysis showing the clustering of the 16S rRNA gene  
122 sequences in the 'light' and 'heavy' fractions of the pristine peatland over time (days 8, 13,  
123 and 19). All replicates (n=4) are given. Full colored and striped symbols represent the 'heavy'  
124 and 'light' fraction, respectively.

125

126 **Figure S8:** Co-occurrence network analysis of methane hotspots derived from the <sup>13</sup>C- and  
127 <sup>unlabelled</sup>C-DNA. The corresponding topological parameters of the networks are provided in  
128 Table 2. Each node represents a bacterial taxon at the OTU level, while the size and shade of  
129 the node corresponds to the number of connections per node and the number of connections  
130 passing through the node (i.e., darker shade for nodes acting as a bridge between other nodes  
131 at higher frequencies), respectively. A connection denotes significant SparCC correlation  
132 ( $p < 0.01$ ) with a magnitude of  $> 0.8$  (positive correlation, blue edges) or  $< -0.8$  (negative  
133 correlations, red edges).

134

135 **Figure S9:** Co-occurrence network analysis after 8, 13, and 19 days incubation of the pristine  
136 peat derived from the <sup>13</sup>C- and <sup>unlabelled</sup>C-DNA. The corresponding topological parameters of  
137 the networks are provided in Table 3. Each node represents a bacterial taxon at the OTU level,  
138 while the size and shade of the node corresponds to the number of connections per node and  
139 the number of connections passing through the node (i.e., darker shade for nodes acting as a  
140 bridge between other nodes at higher frequencies), respectively. A connection denotes  
141 significant SparCC correlation ( $p < 0.01$ ) with a magnitude of  $> 0.8$  (positive correlation, blue  
142 edges) or  $< -0.8$  (negative correlations, red edges).

143

144 **References**

145

146 [1] Kaupper T, Mendes LW, Harnisz M, Krause SMB, Horn MA, Ho A. Recovery of methanotrophic  
147 activity is not reflected in the methane-driven interaction network after peat mining. *Appl Environ*  
148 *Microbiol.* 2021b; doi.org/10.1128/AEM.02355-20.

149

150 [2] Kaupper T, Mendes LW, Lee HJ, Mo Y, Poehlein A, Jia Z, Horn MA, Ho A. When the going gets tough:  
151 Emergence of a complex methane-driven interaction network during recovery from desiccation-  
152 rewetting. *Soil Biol Biochem.* 2021a; doi.org/10.1016/j.soilbio.2020.108109.
