# Supplementary material for: The methane-driven interaction network in terrestrial methane hotspots
Source: PubMed Central journal article supplement (PMC8981696; doi:10.1186/s40793-022-00409-1), 2022-04-05

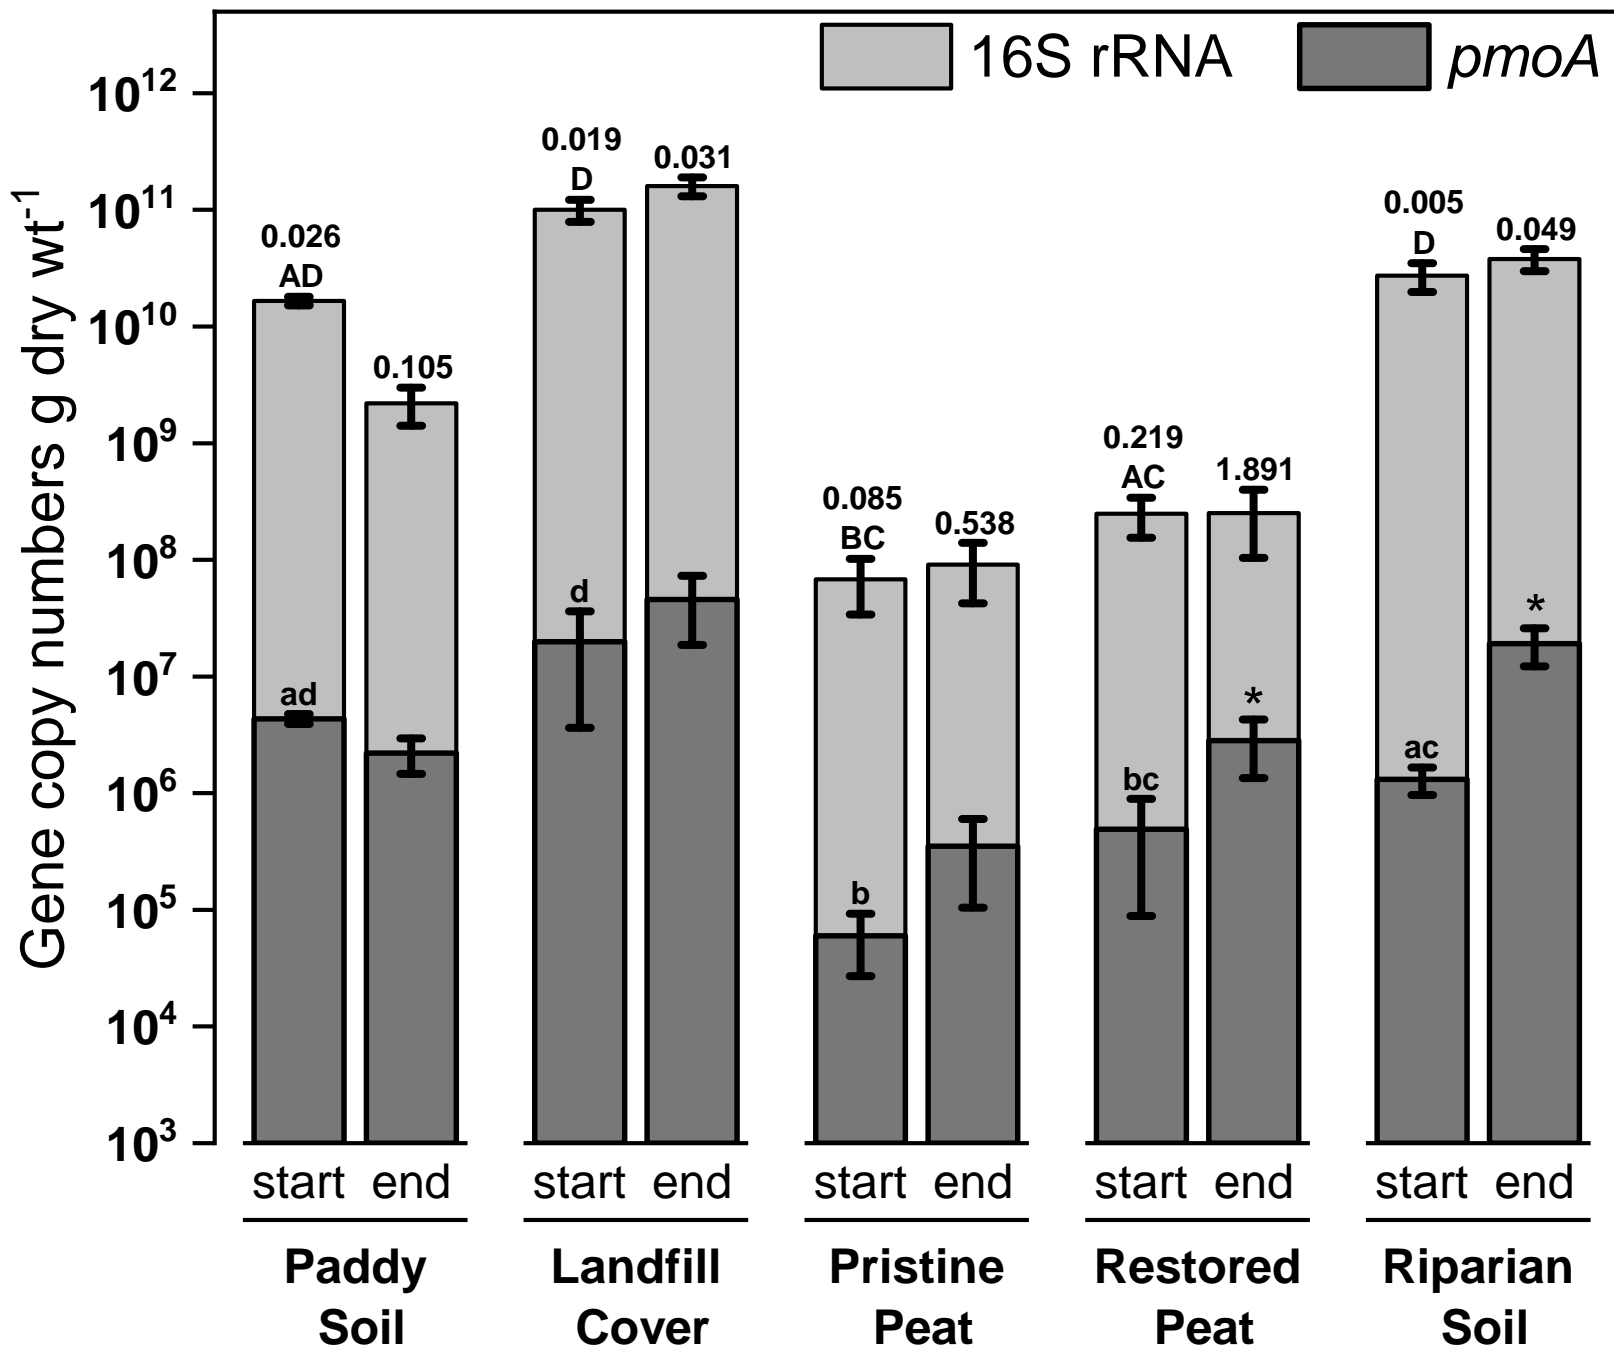

Supplement: 40793_2022_409_MOESM2_ESM.pdf [file 40793_2022_409_MOESM2_ESM.pdf]
