# Supplementary material for: The methane-driven interaction network in terrestrial methane hotspots
Source: PubMed Central journal article supplement (PMC8981696; doi:10.1186/s40793-022-00409-1), 2022-04-05
Supplement: 40793_2022_409_MOESM9_ESM.pdf [file 40793_2022_409_MOESM9_ESM.pdf]

**Paddy soil**

**Landfill cover**

**Pristine peatland**

**Restored peatland**

**Riparian soil**

**$^{13}\text{C}$**

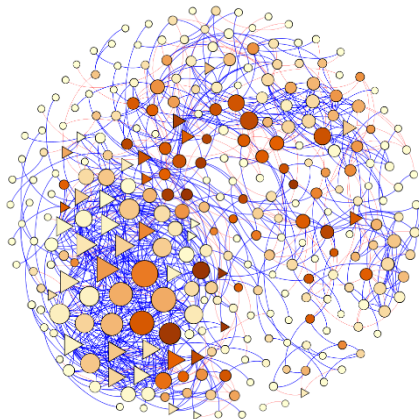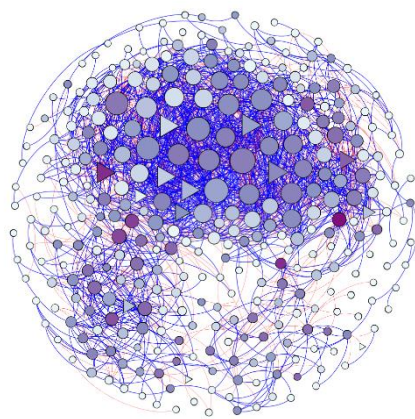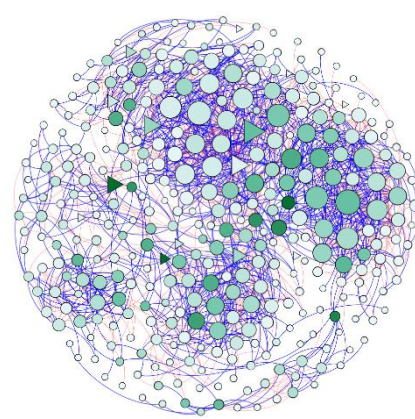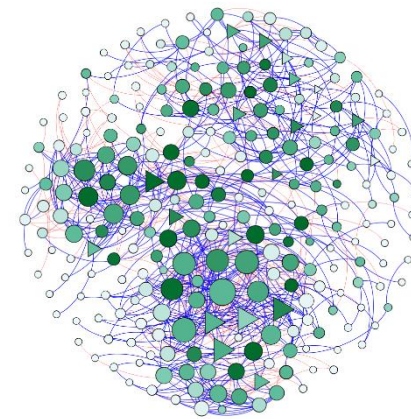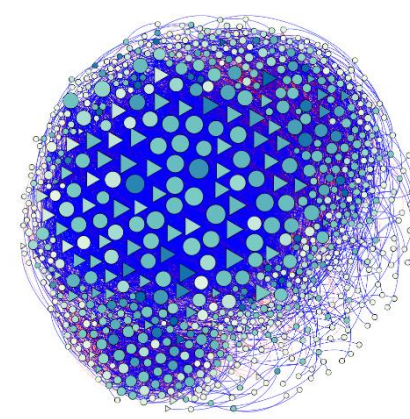

**Unlabelled  $\text{C}$**

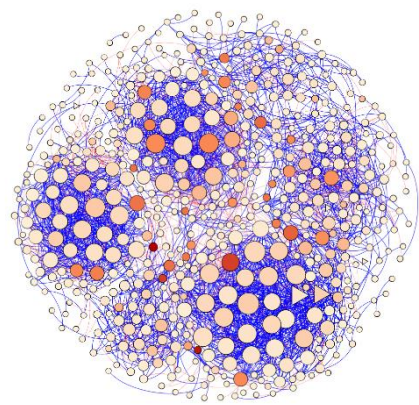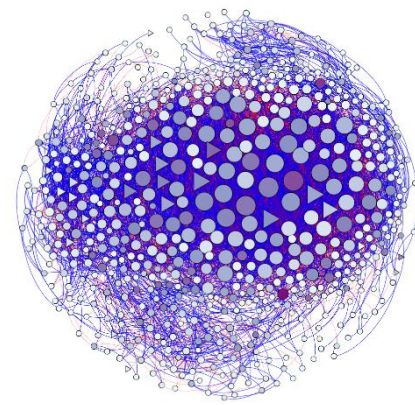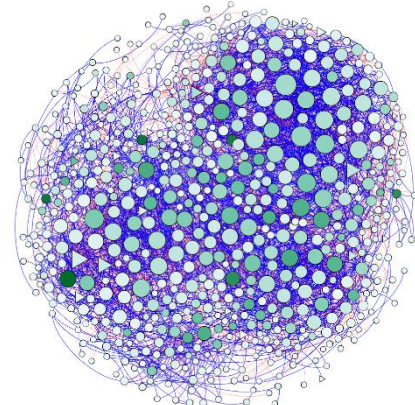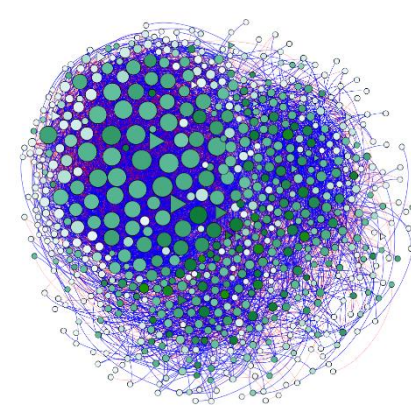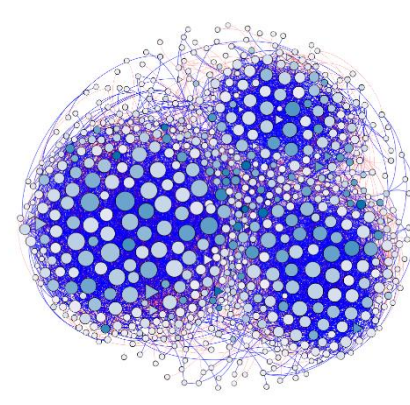

**Figure S8**
