# Supplementary material for: The methane-driven interaction network in terrestrial methane hotspots
Source: PubMed Central journal article supplement (PMC8981696; doi:10.1186/s40793-022-00409-1), 2022-04-05
Supplement: 40793_2022_409_MOESM10_ESM.pdf [file 40793_2022_409_MOESM10_ESM.pdf]

Day 8

Day 13

Day 19

$^{13}\text{C}$

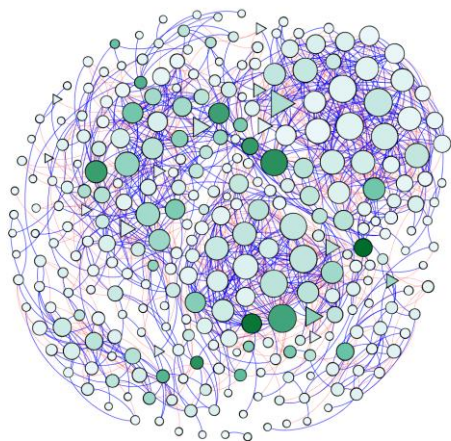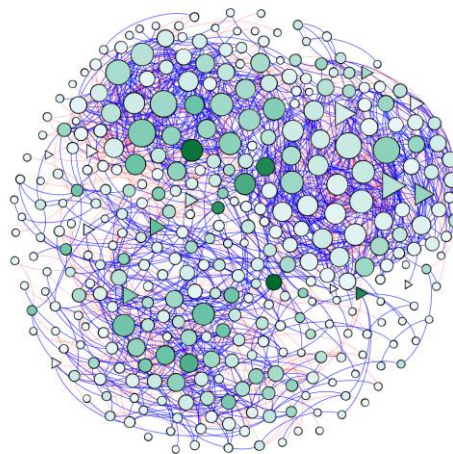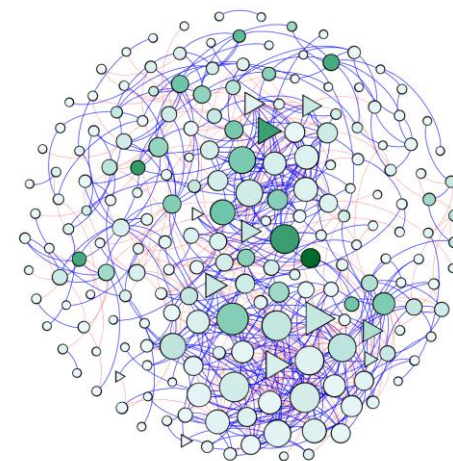

Unlabelled  $\text{C}$

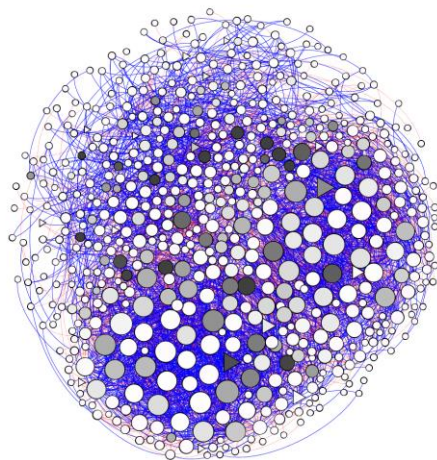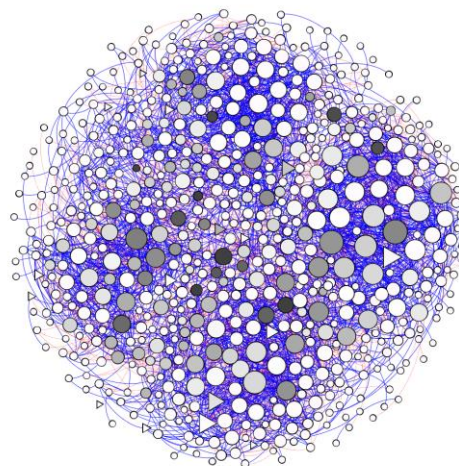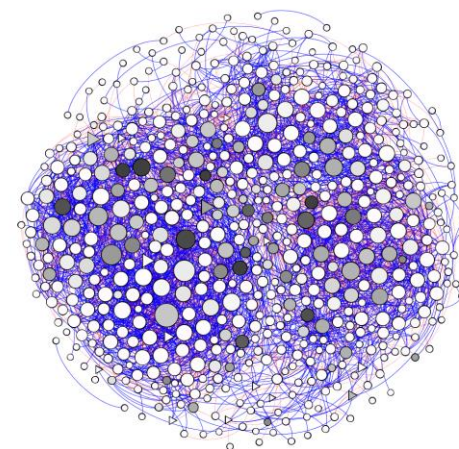

Figure S9
